# Supplementary material for: High throughput electronic detection of biomarkers using enzymatically amplified metallization on nanostructured surfaces
Source: Royal Society of Chemistry journal article supplement (doi:10.1039/d4ay01657b), 2024-01-01
Supplement: d4ay01657b1.pdf [file d4ay01657b1.pdf]

## Supplementary Materials for

### **High Throughput Electronic Detection of Biomarkers Using Enhanced Enzymatically Amplified Metallization on Nanostructured Surfaces**

Hanhao Zhang *et al.*

\*Leading author. Email: [aniruddh.sarkar@bme.gatech.edu](mailto:aniruddh.sarkar@bme.gatech.edu)

#### **This PDF file includes:**

Supplementary Text  
Figs. S1 to S6  
Tables S1 to S2

## Supplementary Text

Drawing designs of the chip (hz96mixed.dxf, hz965um.dxf) and casing for 3D printing (96chipHolder v27.stl, electronicsHolder v7.stl) can be accessed at <https://github.com/spencerZh/easyELISAchip>

Arduino code for the reader can be accessed at <https://github.com/josiahrudge/impedance-multiplexing>

Android application for data visualization and corresponding code can be accessed at [https://github.com/josiahrudge/ELISA\\_App](https://github.com/josiahrudge/ELISA_App)

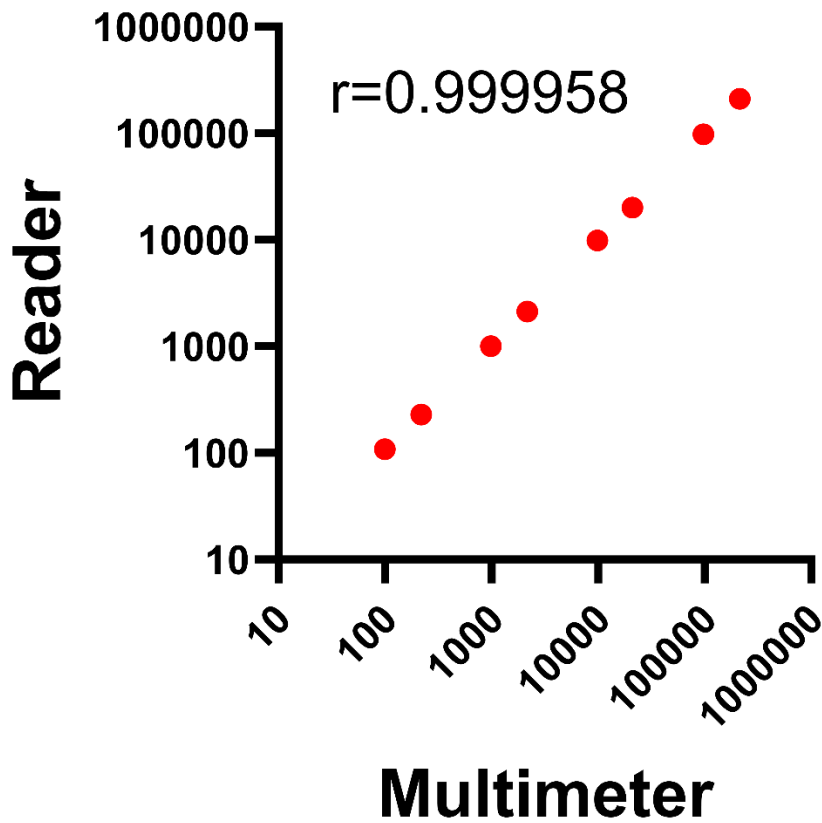

**Fig. S1.**

Correlation between resistance reading obtained from the portable reader and that of a digital multimeter. Eight different resistances were tested ranging from 100 ohms to 210000 ohms. Pearson correlation was performed with 95% confidence interval.

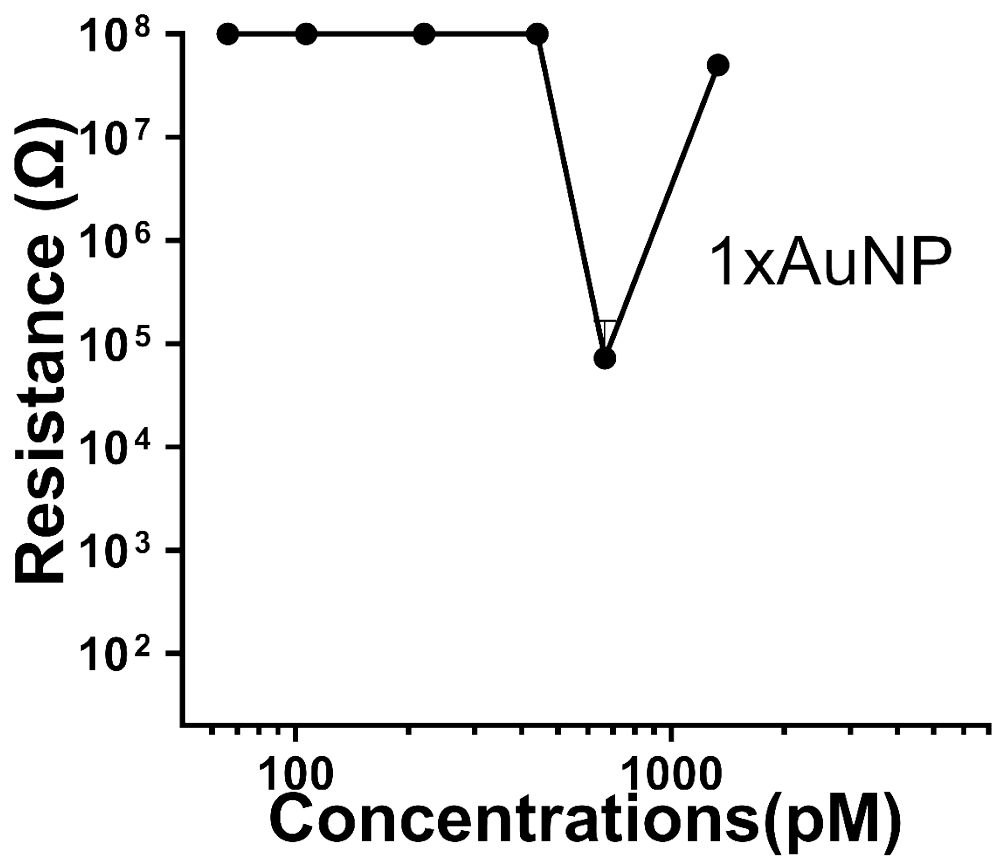

Fig. S2.

Resistance of  $\mu$ IDE using 1X 10nm AuNP on 5 $\mu$ m electrodes.

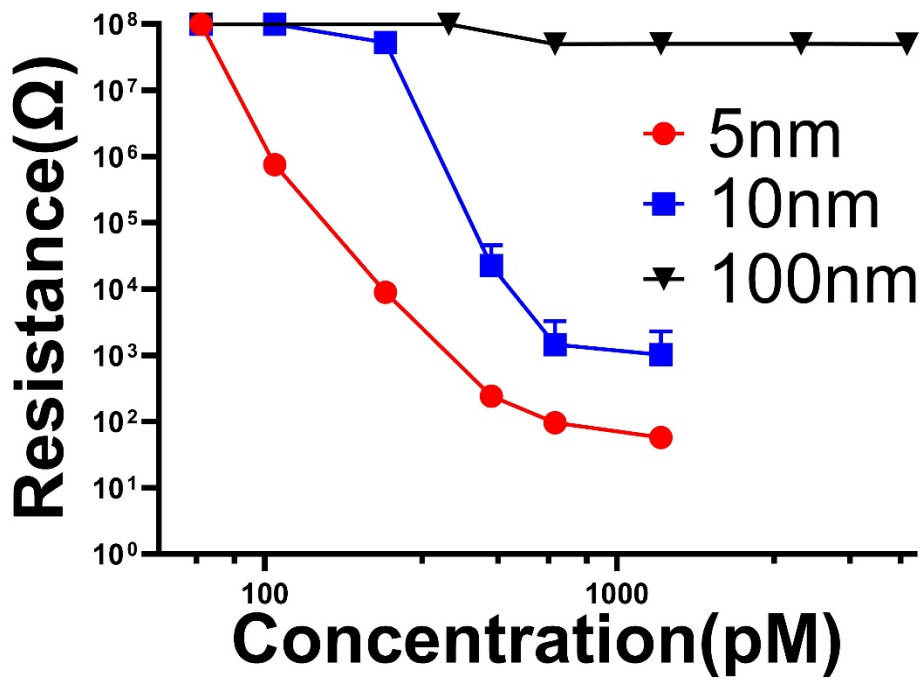

Fig. S3.

Resistance readings from dilution curves of anti-S mAb using 0.1X AuNP on  $\mu$ IDEs with  $10\mu\text{m}$  electrode gaps with different AuNP diameters.

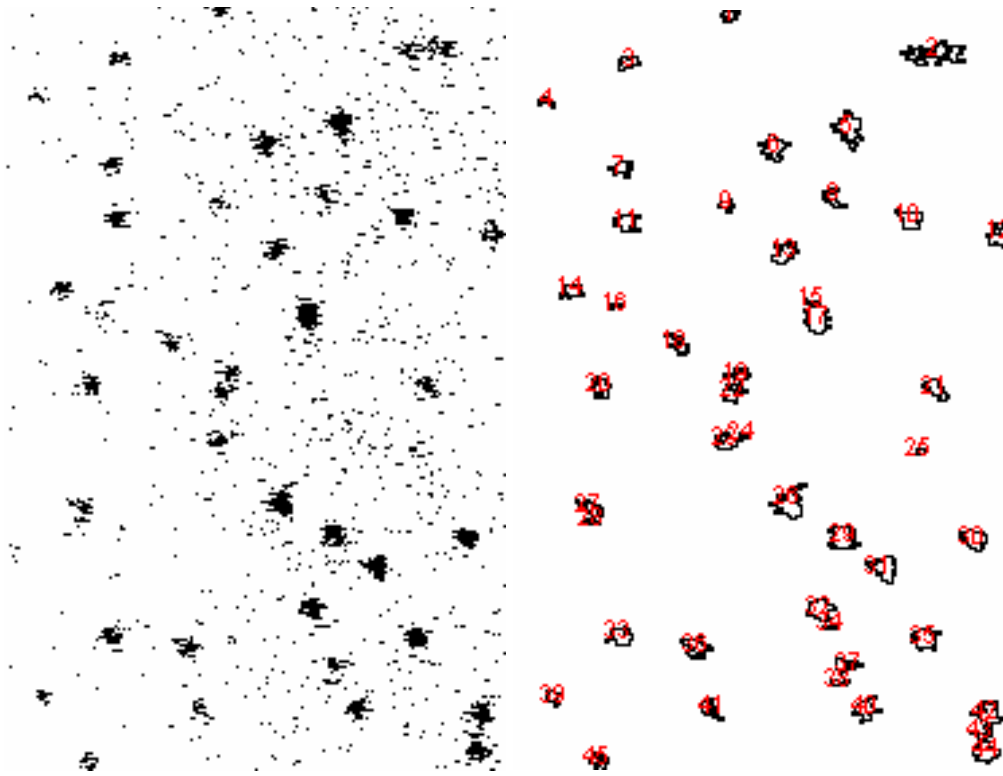

**Fig. S4.**

Procedure of ImageJ particle counting plugin with denoise (left) and corresponding particle location (right).

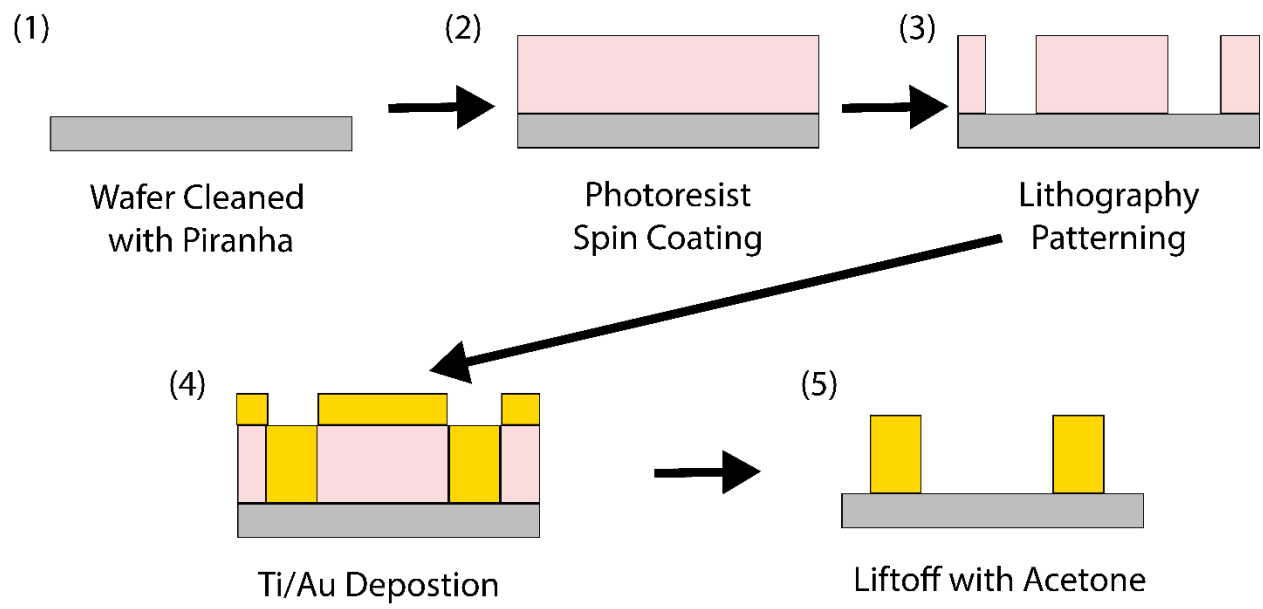

**Fig. S5.**  
Procedure of microfabricating the EASyELISA chip.

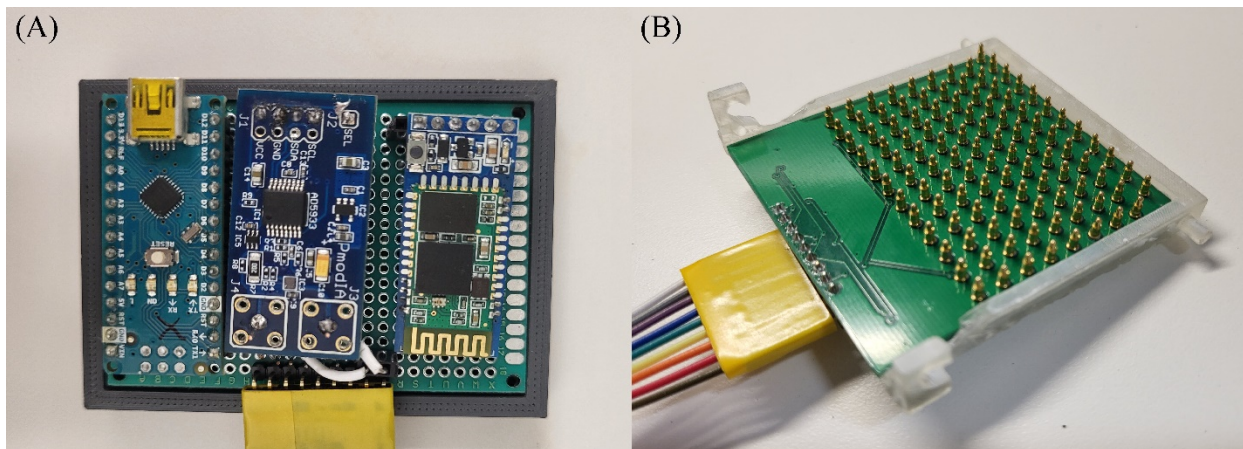

**Fig. S6.**

Close-up view of the portable reader including (A). Arduino Nano (left), PmodIA (middle), HC05 Bluetooth module (right) attached to a custom printed circuit board and (B) contact pins soldered on the board of ADG731 multiplexer.



|                              | Compatible with ELISA | Detection Method  | Analyte                                               | High Throughput Demo | Fabrication Complexity                  | Dry or wet measurement |
|------------------------------|-----------------------|-------------------|-------------------------------------------------------|----------------------|-----------------------------------------|------------------------|
| Chen, et al <sup>1</sup>     | No                    | Optical           | Enzyme only                                           | No                   | N/A                                     | Wet                    |
| Liu, et al <sup>2</sup>      | No                    | Optical           | Enzyme only                                           | No                   | N/A                                     | Wet                    |
| Weizmann, et al <sup>3</sup> | No                    | Electronic        | DNA                                                   | No                   | Low                                     | Dry                    |
| Juang, et al <sup>4</sup>    | Yes                   | Electronic        | Sandwich assay                                        | Yes                  | High                                    | Wet                    |
| Tang, et al <sup>5</sup>     | Yes                   | Electronic        | Sandwich assay                                        | Yes                  | Medium                                  | Wet                    |
| Glavan, et al <sup>6</sup>   | Yes                   | Electronic        | Sandwich assay                                        | No                   | Low                                     | Wet                    |
| <b>Current Work</b>          | <b>Yes</b>            | <b>Electronic</b> | <b>Anything compatible with sandwich assay format</b> | <b>Yes</b>           | <b>Low (one patterning +deposition)</b> | <b>Dry</b>             |

**Table S1.**

Comparison between current work and existing works on detection assays utilizing enzyme, metal deposition and gold.

| Diameter(nm) | Peak SPR Wavelength (nm) | NPS/ml   | Particle Volume (nm <sup>3</sup> ) | Surface Area (nm <sup>2</sup> ) | OD |
|--------------|--------------------------|----------|------------------------------------|---------------------------------|----|
| 5            | 515-520                  | 5.47E+13 | 6.54E+01                           | 7.85E+01                        | 1  |
| 10           | 515-520                  | 5.98E+12 | 5.24E+02                           | 3.14E+02                        | 1  |
| 100          | 572                      | 3.84E+09 | 5.24E+05                           | 3.14E+04                        | 1  |

**Table S2.**

Properties of AuNP in stock solutions.

## References

1. J. Chen, A. A. Jackson, V. M. Rotello and S. R. Nugen, *Small*, 2016, **12**, 2469-2475.
2. H. Liu, B. Liu, P. Huang, Y. Wu, F. Y. Wu and L. Ma, *Mikrochim Acta*, 2020, **187**, 551.
3. Y. Weizmann, D. M. Chenoweth and T. M. Swager, *Journal of the American Chemical Society*, 2011, **133**, 3238-3241.
4. D. S. Juang, C.-H. Lin, Y.-R. Huo, C.-Y. Tang, C.-R. Cheng, H.-S. Wu, S.-F. Huang, A. Kalnitsky and C.-C. Lin, *Biosensors and Bioelectronics*, 2018, **117**, 175-182.
5. C. K. Tang, A. Vaze, M. Shen and J. F. Rusling, *ACS Sensors*, 2016, **1**, 1036-1043.
6. A. C. Glavan, D. C. Christodouleas, B. Mosadegh, H. D. Yu, B. S. Smith, J. Lessing, M. T. Fernández-Abedul and G. M. Whitesides, *Analytical Chemistry*, 2014, **86**, 11999-12007.
